# Supplementary material
Source: PubMed Central journal article supplement (PMC307693)

TRPC4 +/+

TRPC4 -/-

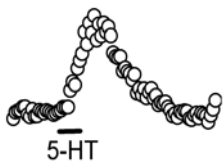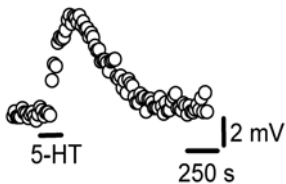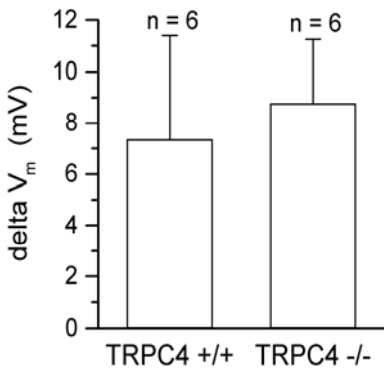

Supplement: pnas_100_26_16065__10.pdf [file pnas_100_26_16065__10.pdf]

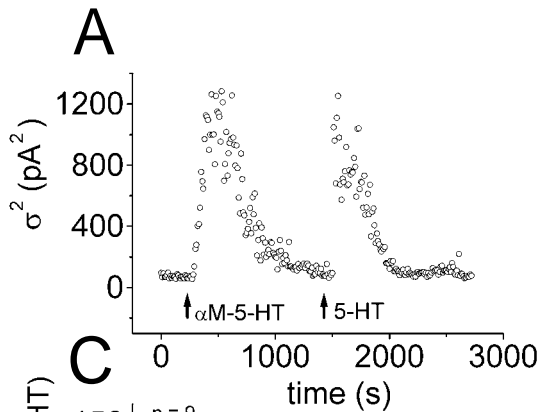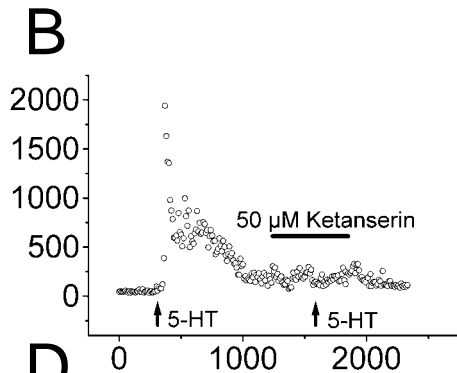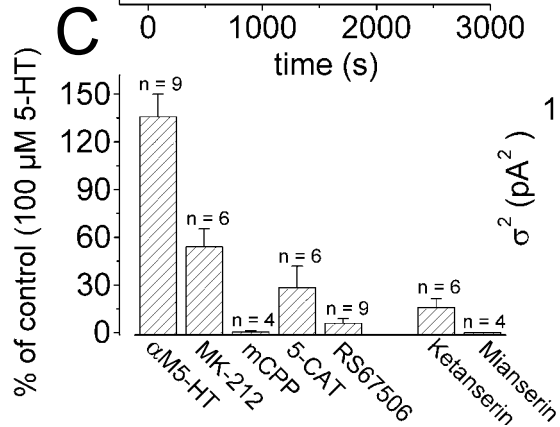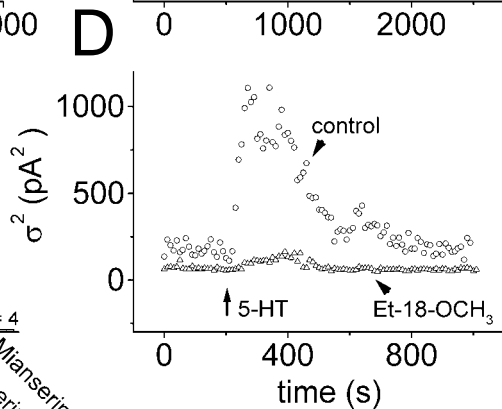

Supplement: pnas_100_26_16065__4.pdf [file pnas_100_26_16065__4.pdf]

**A**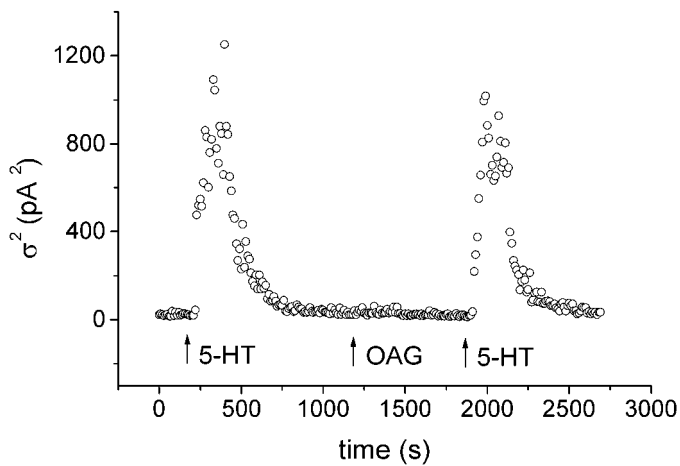**B**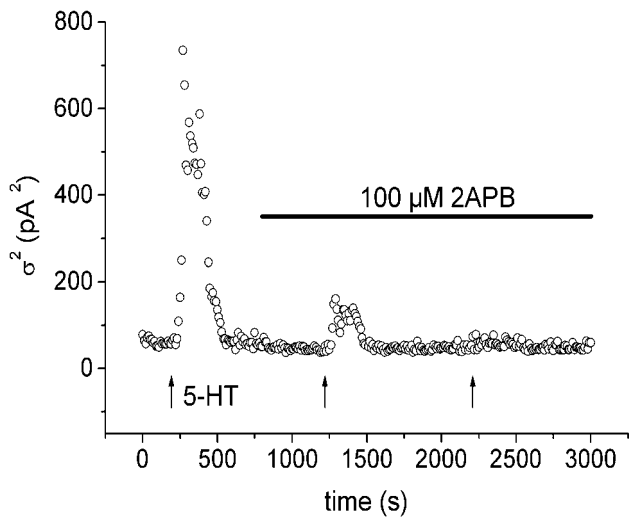

Supplement: pnas_100_26_16065__6.pdf [file pnas_100_26_16065__6.pdf]
